# Supplementary material
Source: Springer Nature journal article supplement (https://www.springermedizin.de/resource/supplementary/12885_2013_3875_MOESM2_ESM.pdf/9464650)

**a**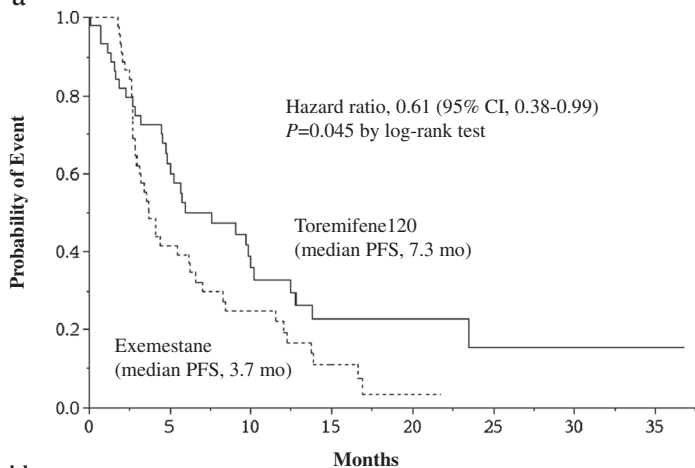**No. at risk**

|               |    |    |    |   |   |   |   |   |
|---------------|----|----|----|---|---|---|---|---|
| Toremifene120 | 46 | 25 | 13 | 8 | 5 | 3 | 2 | 1 |
| Exemestane    | 45 | 18 | 10 | 4 | 1 | 0 | 0 | 0 |

**b**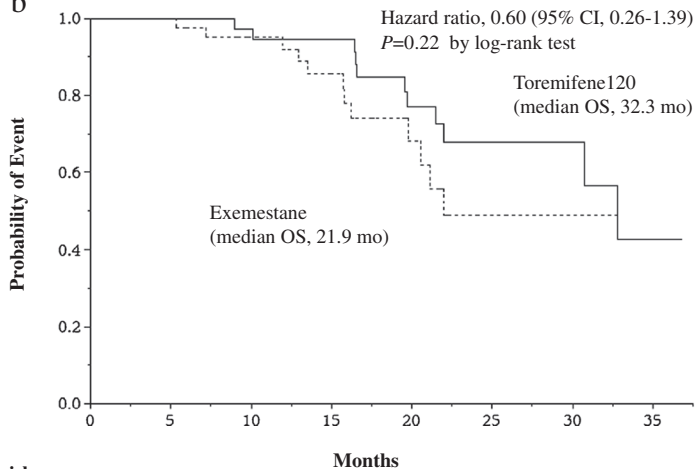**No. at risk**

|               |    |    |    |    |    |   |   |   |
|---------------|----|----|----|----|----|---|---|---|
| Toremifene120 | 46 | 42 | 36 | 31 | 12 | 8 | 2 | 1 |
| Exemestane    | 45 | 44 | 33 | 26 | 13 | 4 | 1 | 0 |

Supplement: MOESM2 [file 9464650]
